# Supplementary material for: Construction of molecular wires based on a gold(i) bis-σ-acetylide building block incorporated into ruthenium(ii) polypyridyl complexesElectronic supplementary information (ESI) available: preparation and characterization data for 1, 3 and 4 and Fig. S1. See http://www.rsc.org/suppdata/cc/b1/b111248c/
Source: Royal Society of Chemistry journal article supplement (doi:10.1039/b111248c), 2002-02-20
Supplement: b111248c.doc [file b111248c.doc]

Electronic Supplementary Information

Preparation of [(bpy)2Ru(Phen-CC-Au-CC-phen)Ru(II)(bpy)2](PF6)3 (**1**)

The ruthenium(II) complex [(bpy)2Ru(3-ethynyl-phenanthroline)](PF6)2 (**2**) (182 mg, 0.2 mmol) was dissolved in CH3CN (40 ml) under N2. To the resulting orange solution Au(tetra-hydrothiophene)Cl (32 mg, 0.1 mmol) and diisopropylamine (0.15 ml) were added successively. After the mixture was stirred at 50 °C for 12 h, the solvent and excess diisopropylamine were removed under reduced pressure. The resulting residue was chromatographed on silica gel (Wakogel C-200), eluted with CH3CN-H2O-sat. KNO3 aq. (93:6:1) followed by the anion exchange with NH4PF6 to afford an orange-red solid. The solid was washed with ethyl acetate, water, and ether successively. Complex **1** was obtained as an orange powder(120 mg, 64%).

IR (KBr disk, cm-1) 2106. UV/VIS (CH3CN) abs/nm (ε×10-4 ) 452 (2.63), 424 (2.28), 362 (5.65), 287 (13.46), 249 (7.96). MS(ESI) m/z 1721 (M-PF6)+, 788 (M-2PF6)2+. Anal. Calc. for C68H46N12P3F18Au1Ru2·5H2O: C, 41.72; H, 2.89; N 8.59. Found C, 41.54; H, 2.53; N 8.95. 1H-NMR(600MHz in CD3CN):  8.548 (d, J = 8.0 Hz, phen-H9),  8.539 (d, J = 8.0 Hz, bpyH6'),  8.512 (d, J = 8.0 Hz, bpyH6'),  8.484 (d, J = 8.0 Hz, bpyH6),  8.455 (d, J = 7.7 Hz, bpyH6),  8.394 (s, phen-H2),  8.157 (d, J = 8.9 Hz, H5),  8.101 (dd, J = 8.0 Hz, J = 7.7 Hz, bpyH5'),  8.082 (dd, J = 8.0 Hz, J = 7.7 Hz, bpyH5'),  8.076 (d, J = 8.9 Hz, H6),  8.006 (d, J = 5.3 Hz, H7),  8.001 (dd, J = 8.0 Hz, J = 7.7 Hz, bpyH5),  7.991 (dd, J = 8.0 Hz, J = 7.7 Hz, bpyH5),  7.859 (d, J = 5.5 Hz, bpyH3'),  7.853 (s, phen-H4),  7.802 (d, J = 5.5 Hz, bpyH3'),  7.667 (dd, J = 5.3 Hz, J = 8.0 Hz, H8),  7.615 (d, J = 5.5 Hz, bpyH3),  7.521 (d, J = 5.5 Hz, bpyH3'),  7.461 (dd, J = 7.7 Hz, J = 5.5 Hz, bpyH4'),  7.433 (dd, J = 7.7 Hz, J = 5.5 Hz, bpyH4'),  7.231 (dd, J = 7.7 Hz, J = 5.5 Hz, bpyH4),  7.226 (dd, J = 7.7 Hz, J = 5.5 Hz, bpyH4),  7.66 - 7.55 (m, *m-*phenylH),  7.55 - 7.51 (m, *o-* and *p-*phenylH).

Preparation of [(bpy)2Ru{(PPh3)-Au-CC-Phen-CC-Au-(PPh3)}](PF6)2 (**3**)

93 mg of [Ru(bpy)2(3,8-bis(ethynyl)-phenanthroline)](PF6)2 **5** (0.1 mmol) and diisopropylamine (1.3 ml) were dissolved in a mixed solvent of CH3OH/CH2Cl2 (7:3) (30 ml) under N2. This solution was added to the CH3OH/CH2Cl2 (7:3) solution (50 ml) of Au(PPh3)Cl (99 mg, 0.2 mmol) and the mixture was stirred at 30 °C under N2. After 3d, an orange-red precipitate appeared in the solution. The precipitate was collected by filtration under low-pressure and washed with small amount of EtOH. The residue was redissolved in CH2Cl2 (60 ml) to remove insoluble impurities. The solvent was removed from the filtrate and a resulting orange-red powder was dried at 30 °C under vacuum for 5h, to give 95 mg of **3** (51%).

IR (KBr disk, cm-1) 2108. UV/VIS (CH3CN) abs/nm (ε×10-4 ) 452 (1.38), 428 (1.28), 369 (5.86), 359 (5.73), 287 (9.75), 240 (8.28). MS(ESI) *m/z* 1703 (M-PF6)+, 779 (M-2PF6)2+. Anal. Calc. for C72H52N6P4F12Au2Ru1: C, 46.46; H, 3.06; N 4.69. Found C, 46.75; H, 2.84; N 4.55. 1H-NMR(600MHz in CD3CN):  8.513 (d, J = 1.6 Hz, bpyH6'),  8.477 (d, J = 7.8 Hz, bpyH6),  8.444 (d, J = 7.8 Hz, phen-H2 and -H9),  8.069 (s, phen-H5 and -H6),  8.075 (dd, J = 7.8 Hz, J =7.2 Hz, bpyH5'),  7.995 (dd, J = 7.8 Hz, J =7.2 Hz, bpyH5),  7.892 (d, J = 1.6 Hz, phen-H4 and -H7),  7.798 (d, J = 6.0 Hz, bpyH3'),  7.597 (d, J = 6.0 Hz, bpyH3),  7.435 (dd, J = 7.2 Hz, J = 6.0 Hz, bpyH'4),  7.248 (dd, J = 7.2 Hz, J = 6.0 Hz, bpyH4),  7.66 - 7.55 (m, *m-*phenylH),  7.55 - 7.51 (m, *o-* and *p-*phenylH)..

Preparation of [(bpy)2Ru{Phen-CC-Au-(PPh3)}](PF6)2 (**4**)

Au(PPh3)Cl (50 mg, 0.1 mmol) and diisopropylamine (0.5 ml) were added successively to the CH2Cl2 solution of **2** (91 mg, 0.1 mmol) under N2. After the mixture was stirred at 30 °C for 20 h, the solvent and excess diisopropylamine were removed under reduced pressure. The residue was redissolved in CH3CN-H2O (8:2) (50 ml) and acetonitrile was slowly evaporated until orange-red compound **4** was precipitated (100 mg, 73%).

IR (KBr disk, cm-1) 2112. UV/VIS (CH3CN) abs/nm (ε×10-4) 452 (1.11), 423 (0.96), 343 (2.76), 287 (7.01), 238 (6.16). MS(ESI) *m/z* 1221 (M-PF6)+, 538 (M-2PF6)2+. 1H-NMR(600MHz in CD3CN):  8.562 (dd, J = 8.2 Hz, J = 1.0 Hz, phen-H9),  8.527 (d, J = 8.0 Hz, bpyH6'),  8.518 (d, J = 8.0 Hz, bpyH6'),  8.491 (d, J = 8.0 Hz, bpyH6),,  8.488 (d, J = 1.7 Hz, phen-H2),  8.478 (d, J = 8.0 Hz, bpyH6),  8.191 (d, J = 8.9 Hz, H5),  8.115 (d, J = 8.9 Hz, H6),  8.087 (dd, J = 8.0 Hz, J = 7.7 Hz, bpyH5'),  8.078 (dd, J = 8.0 Hz, J = 7.7 Hz, bpyH5'),  8.035 (dd, J = 5.2 Hz, J = 1.0 Hz, H7),  8.006 (dd, J = 8.0 Hz, J = 7.7 Hz, bpyH5),  7.980 (dd, J = 8.0 Hz, J = 7.7 Hz, bpyH5),  7.950 (d, J = 1.7 Hz, phen-H4),  7.856 (d, J = 5.0 Hz, bpyH3'),  7.797 (d, J = 5.0 Hz, bpyH3'),  7.689 (dd, J = 8.2 Hz, J = 5.0 Hz, H8),  7.620 (d, J = 5.0 Hz, bpyH3),  7.525 (d, J = 5.0 Hz, bpyH3'),  7.440 (dd, J = 7.7 Hz, J = 5.0 Hz, bpyH4'),  7.436 (dd, 7.7 Hz, J = 5.0 Hz, bpyH4'),  7.239 (d, 7.7 Hz, J = 5.0 Hz, bpyH4),  7.228 (d, 7.7 Hz, J = 5.0 Hz, bpyH4).

Fig.1S: Absorption (left —), corrected excitation (- - - -), and uncorrected emission spectra (right —) of **1** in acetonitrile at room temperature. The excitation spectrum was detected at 597 nm.
